# Supplementary material for: Study protocol for IMPRoVE: a multicentre prospective observational cohort study of the incidence, impact and mechanisms of perioperative right ventricular dysfunction in non-cardiac surgery
Source: PubMed Central journal article supplement — BMJ Open. 2023 Sep 6;13(9):e074687. doi: 10.1136/bmjopen-2023-074687 (PMC10496661; doi:10.1136/bmjopen-2023-074687), 2023-09-06
Supplement: bmjopen-2023-074687supp001.pdf [file bmjopen-2023-074687supp001.pdf]

### Contraindications to Cardiovascular Magnetic Resonance Imaging

Presence of:

- cardiac pacemaker
- artificial heart valve
- neurostimulator
- cochlear implant
- aneurysm clips
- metal injuries to the eye
- loose metal in a part of the body
